# Supplementary material
Source: PubMed Central journal article supplement (PMC5996767)
Supplement: NIHMS717662-supplement-JNE_12_4_056005_SuppData_pdf.pdf [file NIHMS717662-supplement-JNE_12_4_056005_SuppData_pdf.pdf]

**SUPPLEMENTAL INFORMATION****A wireless transmission neural interface system  
for unconstrained non-human primates**

Jose A. Fernandez-Leon<sup>1,2,5\*</sup>, Arun Parajuli<sup>1\*</sup>, Robert Franklin<sup>3</sup>, Michael Sorenson<sup>3</sup>, Daniel J. Felleman<sup>1</sup>, Bryan J. Hansen<sup>1,4</sup>, Ming Hu<sup>1</sup>, and Valentin Dragoi<sup>1</sup>

(1) Dept. of Neurobiology and Anatomy, Univ. of Texas–Houston Medical School, Houston, USA

(2) Centre for Computational Neuroscience and Robotics, Univ. of Sussex, Brighton, UK

(3) Blackrock Microsystems, Inc., Salt Lake City, UT, USA

(4) Systems Neurobiology Laboratory, The Salk Institute, La Jolla, USA

(5) Current Address: Dept. of Neuroscience, Baylor College of Medicine, Houston, TX 77030, USA

\* These authors contributed equally to this work

**Address correspondence to:**

Valentin Dragoi  
Department of Neurobiology and Anatomy  
University of Texas-Houston Medical School, Suite 7.166  
6431 Fannin St., Houston, TX 77030, USA  
Phone: (713)-500-5710  
Fax: (713)-500-0621  
Email: valentin.dragoi@uth.tmc.edu

## SUPPLEMENTARY FIGURES

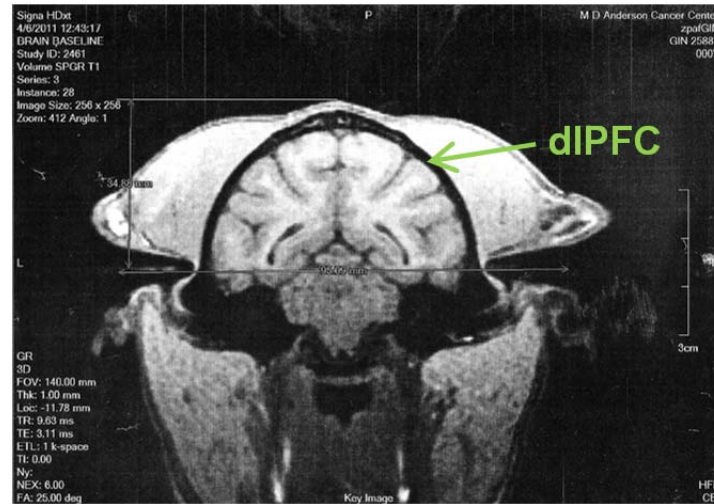

**Figure S.1.** Example of the outlining white matter on one T1 coronal section. The coronal image from one monkey was obtained using MRI technique. The image highlights the dlPFC area, according to MRI and stereotaxic specifications (Paxinos et al., 2000, Saleem and Logothetis, 2007), where the 96-channels Utah array was implanted. The field of view (*FOV*) is 140.00 mm defined as the size of the two dimensional spatial encoding area of the image. The slice had a thickness (*Thk*) of 1.00 mm. A short repetition time ( $TR=9.63$  ms) and short echo time ( $TE=3.11$  ms) sequence was defined for the T1-weighted. The sample averaging (*NEX*) and turbo factor (or Echo Train Length (*ETL*)) related to scan time and image quality was defined as 1 k-space and 6.00 respectively. The fractional anisotropy (*FA*) was 25.00 deg and the inversion time (*TI*) was zero. The plane localizer (*PL*) was defined as -11.78 mm.

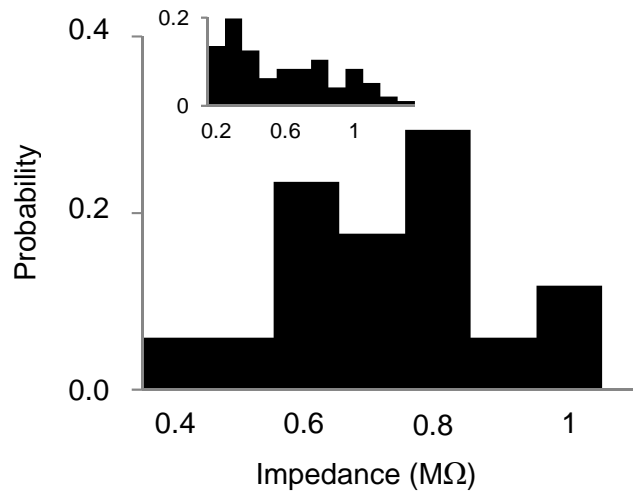

**Figure S.2.** Probability distribution of electrode impedance values for one sample session recorded after 6 months following the dlPFC implant. *Main plot:* distribution of impedances for the 34 electrodes that showed reliable single and multi-unit spiking activity. This figure indicates that a high impedance ( $>0.6$  M $\Omega$ ) was observed in 35% of electrodes (mean impedance  $0.73 \pm 0.17$  M $\Omega$ ) even after several months of implant. *Inset:* impedance distribution for the entire array (96 electrodes) measured in the same session.

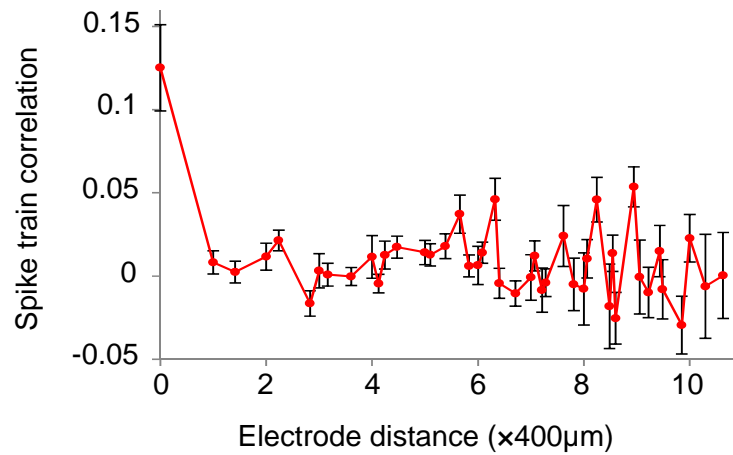

**Figure S.3.** Average spike train correlation as a function of distance. Spike trains were first converted to continuous signals by convolving them with a Gaussian kernel of 300 ms width. Pearson correlation between the continuous signals from two neurons was computed to quantify similarity in their spiking activity. The spike train correlation shows a sharp decay for cell pairs recorded from the same electrode compared to other distances. The average value did not change significantly with distance ( $>400 \mu\text{m}$ ) and remained near zero, whereas the variability increased with distance (see **Supplemental Figure S.4**).

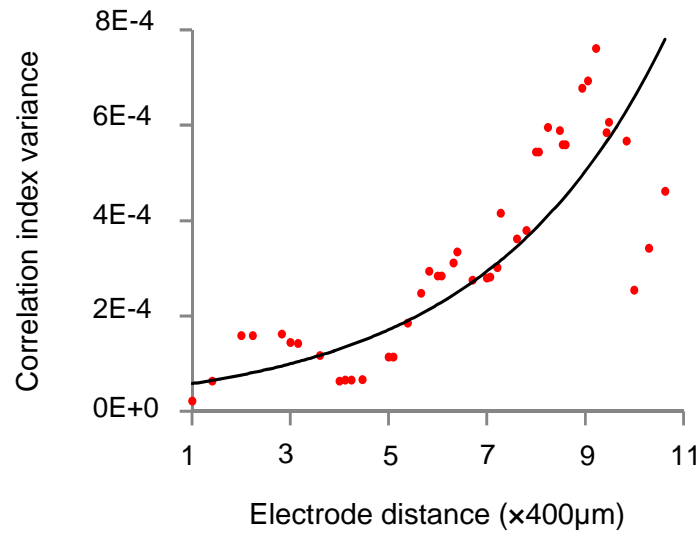

**Figure S.4.** Variance of the spike train correlations as a function of distance between electrodes. The variance at a distance is computed using correlation values in a  $[\pm 1]$  electrode pitch window centered at that distance. The variability in correlation value increased with the distance between electrodes. The black trace represents the exponential fit.

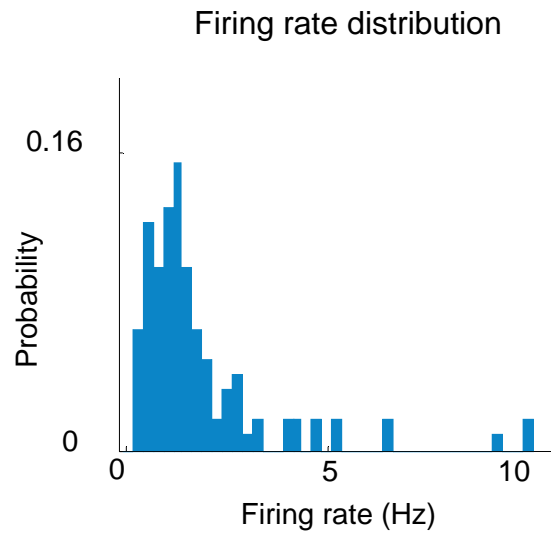

**Figure S.5.** Probability distribution of averaged firing rates of dlPFC neurons during free moving.

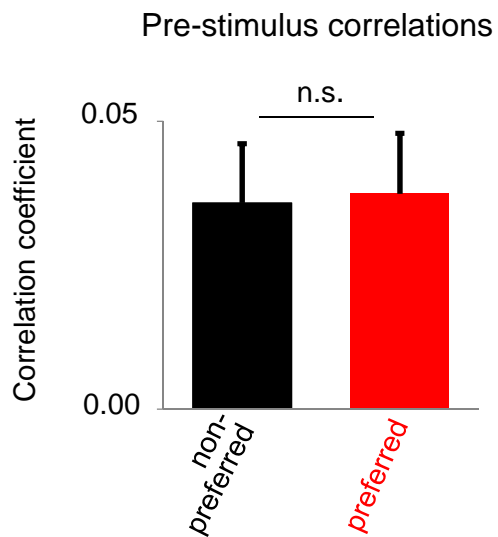

**Figure S.6.** Mean correlation coefficient measured before stimulus presentation (see also **Fig. 7C**). The mean correlation coefficients for non-preferred and preferred rewards were not statistically different ( $P=0.86$ ; Wilcoxon rank sum test).

## SUPPLEMENTARY TABLES

|                                 |                                                                                               |
|---------------------------------|-----------------------------------------------------------------------------------------------|
| <b>Transmitter model name</b>   | Blackrock Cereplex Radio                                                                      |
| <b>Power requirements</b>       | Two 3V CR123A batteries on the transmitter and +5V on the receiver                            |
| <b>Resolution</b>               | 12-bit                                                                                        |
| <b>Sampling frequency</b>       | 20 kSps                                                                                       |
| <b>Input frequency range</b>    | 0.00003-0.0075 MHz                                                                            |
| <b>Input impedance range</b>    | 0.005 M $\Omega$ -0.001 M $\Omega$                                                            |
| <b>Transmit frequency</b>       | Ch 149 – 5745 MHz, Ch 153 – 5765 MHz, Ch 157 – 5785 MHz, Ch 161 – 5805 MHz, Ch 165 – 5825 MHz |
| <b>Wireless standard</b>        | IEEE 802.11n                                                                                  |
| <b>Radio power</b>              | 15 dBm                                                                                        |
| <b>Transmission range</b>       | 32 ft                                                                                         |
| <b>Water ingress protection</b> | Ordinary equipment; not fluid resistant, IP20                                                 |
| <b>Operating environment</b>    | 10°C to 40°C, 5 to 95% R.H. (non-condensing)                                                  |
| <b>Storage environment</b>      | -10°C to 50°C, 5 to 100% R.H. (non-condensing)                                                |

**Table T.1.** Technical specifications of the Blackrock Cereplex radio transmitter.



| Reference                              | Type      | Test model | Noise( $\mu$ V.r.m.s) | Bit (res) | S/s (kSps) | No. of Ch.         | Data (Mbps) | Power (mW)  | Size (mm)             | Radio frequency              |
|----------------------------------------|-----------|------------|-----------------------|-----------|------------|--------------------|-------------|-------------|-----------------------|------------------------------|
| Chae et al.(Chae et al., 2009)         | ASIC      | Bench      | 4.9                   | 9         | 2          | 128                | 90          | 6           | 8.8x7.2xNR            | ---<br>UWB                   |
| Harrison et al.(Harrison et al., 2009) | ASIC      | Bench      | 5.0                   | 10        | 15         | 100                | 0.35        | 10          | 5.4x7.0xNR            | 902/928 MHz<br>FSK           |
| Rizk et al.(Rizk et al., 2007)         | ED        | Rat        | NR                    | 12        | 31         | 96                 | 1           | 100         | 50x40x15              | 916.5 MHz<br>ASK             |
| Szuts et al. (Szuts et al., 2011)      | ED        | Rat        | <4                    | ---       | 20         | 64                 | 12          | 345         | 50x40x30 <sup>i</sup> | 2380 MHz<br>FSK              |
| Rizk et al. (Rizk et al., 2009)        | ED        | Sheep      | 7                     | 12        | 31         | 96                 | NR          | 2000        | 50x40x15              | 916.5 MHz<br>ASK             |
| Borton et al. (Borton et al., 2013)    | ID        | NHP        | 8.6                   | 12        | 20         | 100                | 24          | 90.6        | 56x42x11              | 3200/3800 MHz<br>FSK         |
| Schwarz et al. (Schwarz et al., 2014)  | ED        | NHP        | NR                    | 12        | 31         | 128<br>(each cube) | 2           | 264         | NR                    | 2400 MHz<br>FSK              |
| <b>This work</b>                       | <b>ED</b> | <b>NHP</b> | <b>3.93</b>           | <b>12</b> | <b>20</b>  | <b>96</b>          | <b>24</b>   | <b>4000</b> | <b>56x42x44</b>       | <b>5700-5800 MHz<br/>FSK</b> |

**Table T.2.** Selection of current neural data recording and amplification systems. ASIC: amplifier application-specific integrated circuit; ED: external device; ID: implanted device; NHP: non-human primate; NR stands for not reported; ASK: Amplitude-shift keying. FSK: Frequency-shift keying. UWB: ultra-wideband. <sup>i</sup>back board (transmitter) from a three-part system (microdrive, head board, and back board). R.m.s. stands for root-mean-squared.
